# Supplementary material for: Methylglyoxal-Dependent Glycative Stress and Deregulation of SIRT1 Functional Network in the Ovary of PCOS Mice
Source: PubMed Central journal article supplement (PMC7017084; doi:10.3390/cells9010209), 2020-01-14
Supplement: cells-09-00209-s001.pdf [file cells-09-00209-s001.pdf]

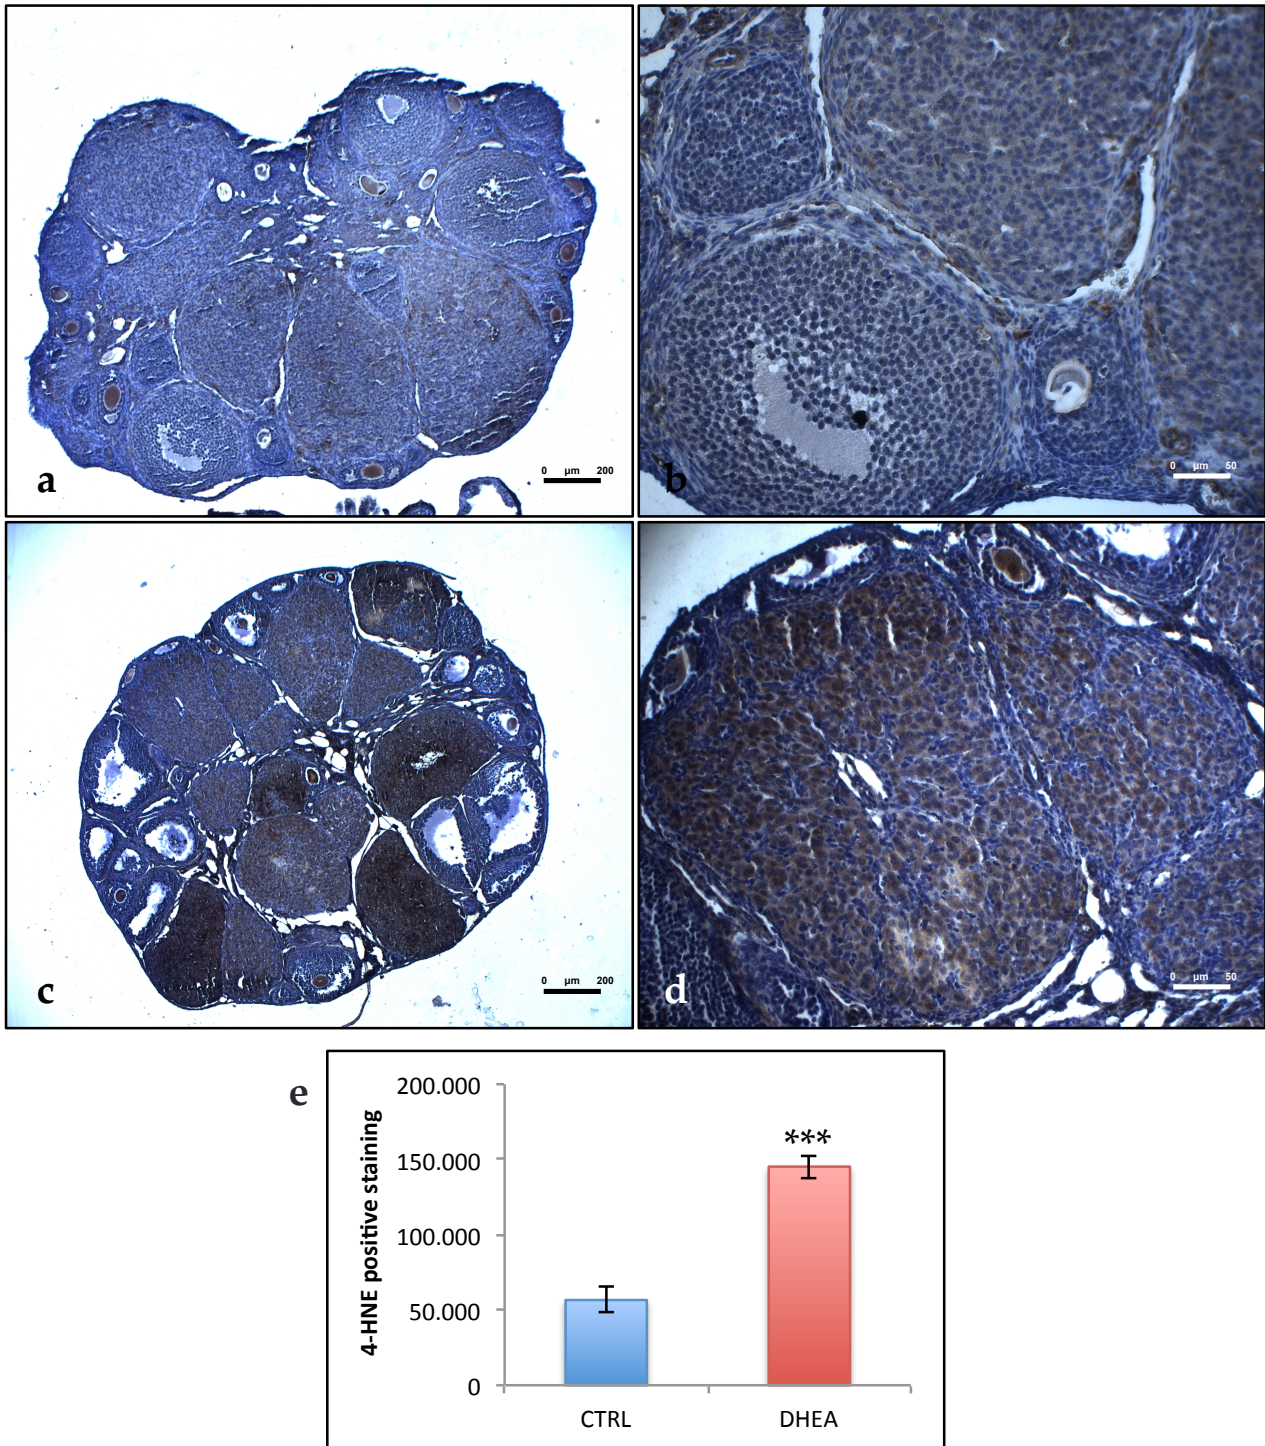

**Supplementary Figure 1.** Immunolocalization and quantification of 4-HNE positive staining. Representative images of 4-HNE in CTRL (a, b) and DHEA (c, d) mice. Quantification of 4-HNE positive staining in the experimental groups (e). Data are presented as means  $\pm$  SEM of mean pixel intensity of 4-HNE signals. Three mice per experimental group were employed. Experiments were done in triplicate. \*\*\* $P < 0.001$ , t-test.
